# Supplementary material for: First Report of blaNDM-1 Bearing IncX3 Plasmid in Clinically Isolated ST11 Klebsiella pneumoniae from Pakistan
Source: MDPI journal article supplement (doi:10.3390/microorganisms9050951), 2021-04-28
Supplement: s1 [file s1]

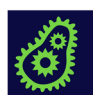

**Table S1.** List of primers used in this study.

| Primer                                      | Primer sequence 5′ → 3′ | Target genes | product size | Annealing T | Ref |
|---------------------------------------------|-------------------------|--------------|--------------|-------------|-----|
| 16S F                                       | AAATTGAAGAGTTTGATCATGG  | 16Sr DNA     | 1554pb       | 55°c        | [1] |
| 16S R                                       | GCTTCTTTAAGGTAAGGAGGT   |              |              |             |     |
| Carbapenem resistant genes Conventional PCR |                         |              |              |             |     |
| NDM F                                       | GGTTTGGCGATCTGGTTTTTC   | NDM variants | 621pb        | 60°c        | [2] |
| NDM R                                       | CGGAATGGCTCATCACGATC    |              |              |             |     |
| GES F                                       | AGTCGGCTAGACCGGAAAG     | GES variants | 399pb        | 58°c        | [3] |
| GES R                                       | TTGTCCGTGCTCAGGAT       |              |              |             |     |
| OXA4F                                       | GCTTGATCGCCCTCGATT      | OXA-48       | 281pb        | 60°c        | [3] |
| OXA4R                                       | GATTTGCTCCGTGGCCGAAA    |              |              |             |     |
| IMP F                                       | TTGACACTCCATTTACAG      | IMP Variants | 139pb        | 56°c        | [3] |
| IMP R                                       | GATCGAGAATTAAGCCACCC    |              |              |             |     |
| VIM F                                       | GATGGTGTTTGGTCGCATA     | VIM variants | 390pb        | 60°c        | [3] |
| VIM R                                       | CGAATGCGCAGCACCAG       |              |              |             |     |
| KPC F                                       | CATTCAAGGGCTTTCTTGCTGC  | KPC variants | 538          | 60°c        | [3] |
| KPC R                                       | ACGACGGCATAGTCATTTGC    |              |              |             |     |
| ESBL genes multiplex PCR                    |                         |              |              |             |     |
| TEM F                                       | CATTTCGGTGTGCGCCCTTATTC | TEM-1        | 800bp        | 60°c        | [3] |
| TEM F                                       | CGTTCATCCATAGTTGCCTGAC  | TEM-2        |              |             |     |
| SHV F                                       | AGCCGCTTGAGCAAATTAAAC   | SHV variants | 713bp        | 60°c        | [3] |

|       |                        |             |       |      |     |
|-------|------------------------|-------------|-------|------|-----|
| SHV R | ATCCCGCAGATAAATCACCAC  |             |       |      |     |
| CTX F | CGC TTT GCG ATG TGC AG | CTX-M types | 550   | 55°C | [4] |
| CTX R | ACC GCG ATA TCG TTG GT |             |       |      |     |
| OXA F | GGCACCAGATTCAACTTTCAAG | OXA-1/4/30  | 564pb | 60°C | [3] |
| OXA R | GACCCCAAGTTTCCTGTAAGTG |             |       |      |     |

## References

1. Ye, H.; Li, Y.; Li, Z.; Gao, R.; Zhang, H.; Wen, R.; Gao, G.F.; Hu, Q.; Feng, Y. Diversified mcr-1-Harboured Plasmid Reservoirs Confer Resistance to Colistin in Human Gut Microbiota. *mBio* **2016**, *7*, e00177, doi:10.1128/mBio.00177-16.
2. Hatrongjit, R.; Kerdsin, A.; Akeda, Y.; Hamada, S. Detection of plasmid-mediated colistin-resistant and carbapenem-resistant genes by multiplex PCR. *MethodsX* **2018**, *5*, 532–536, doi:10.1016/j.mex.2018.05.016.
3. Dallenne, C.; Da Costa, A.; Decré, D.; Favier, C.; Arlet, G. Development of a set of multiplex PCR assays for the detection of genes encoding important beta-lactamases in Enterobacteriaceae. *The Journal of antimicrobial chemotherapy* **2010**, *65*, 490–495, doi:10.1093/jac/dkp498.
4. Ali, T.; Ur Rahman, S.; Zhang, L.; Shahid, M.; Zhang, S.; Liu, G.; Gao, J.; Han, B. ESBL-Producing *Escherichia coli* from Cows Suffering Mastitis in China Contain Clinical Class 1 Integrations with CTX-M Linked to ISCR1. *Frontiers in microbiology* **2016**, *7*, 1931, doi:10.3389/fmicb.2016.01931.
